# Supplementary material for: Moderating the interaction among Pd, CeO2, and Al2O3 for improved three-way catalysts
Source: Royal Society of Chemistry journal article supplement (doi:10.1039/d2dt02693g), 2022-01-01
Supplement: d2dt02693g1.pdf [file d2dt02693g1.pdf]

## Supporting information for:

# Moderating the interaction among Pd, CeO<sub>2</sub>, and Al<sub>2</sub>O<sub>3</sub> for the improved three-way catalysts

Han Zhao <sup>a,b,\*</sup>, Longchun Bian <sup>c</sup>, Junchen Du <sup>a</sup>, Yunkun Zhao <sup>a,\*</sup>

<sup>a</sup> State Key Laboratory of Advanced Technologies for Comprehensive Utilization of Platinum Metals, Kunming Institute of Precious Metals, Kunming 650106, China

<sup>b</sup> Dalian Institute of Chemical Physics, Chinese Academy of Sciences, Dalian 116023, China

<sup>c</sup> School of Chemical Science and Technology, Yunnan University, Kunming 650091, China

Email:

[hanzhao@dicp.ac.cn](mailto:hanzhao@dicp.ac.cn) (Dr. Han Zhao)

[ykzhao@sohu.com](mailto:ykzhao@sohu.com) (Prof. Yunkun Zhao)

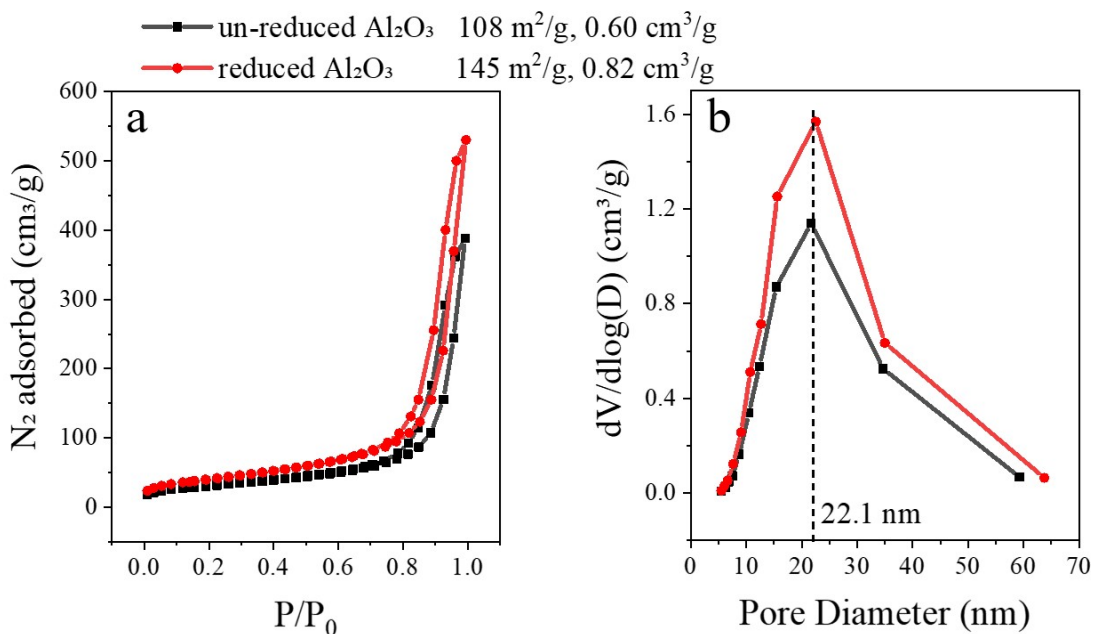

Fig. S1. The (a) isothermal N<sub>2</sub> adsorption/desorption curves and (b) the pore size distribution profiles of the different samples as indicated. The Al<sub>2</sub>O<sub>3</sub> was reduced in 10% H<sub>2</sub>/N<sub>2</sub> at 350 °C for 1h (ramp rate = 10 °C/min), then was naturally cooled to room temperature (RT) in the tubular furnace

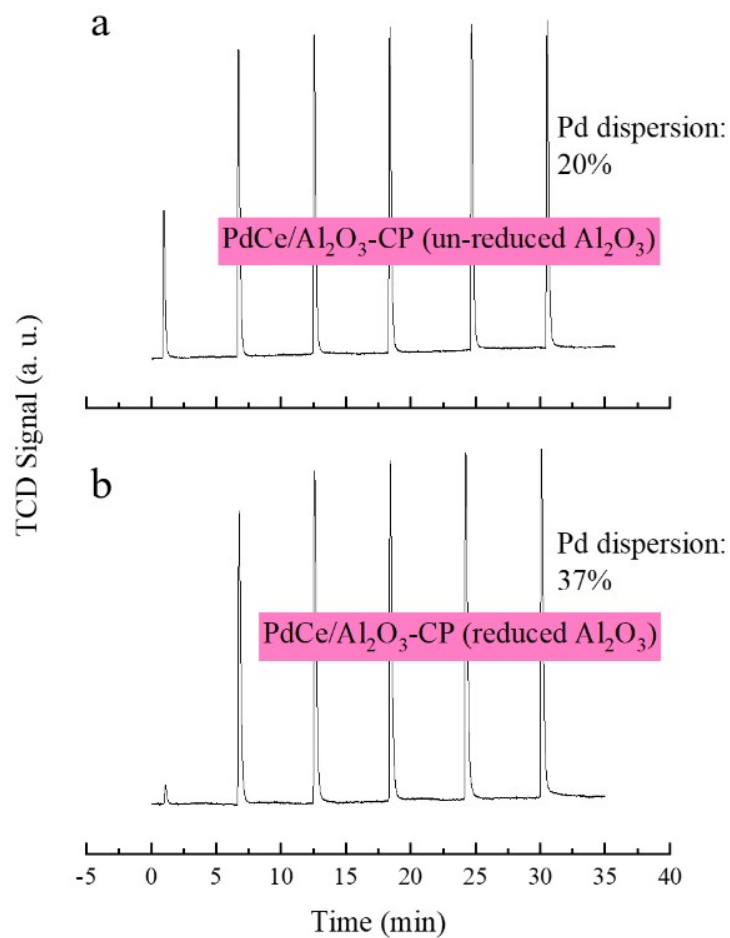

Fig. S2. The CO pulse-chemisorption curves of different catalysts as indicated. The PdCe/Al<sub>2</sub>O<sub>3</sub>-CP (reduced Al<sub>2</sub>O<sub>3</sub>) was identical to the PdCe/Al<sub>2</sub>O<sub>3</sub>-CP, and the PdCe/Al<sub>2</sub>O<sub>3</sub>-CP (un-reduced Al<sub>2</sub>O<sub>3</sub>) was made following the identical procedure to that of the PdCe/Al<sub>2</sub>O<sub>3</sub>-CP (reduced Al<sub>2</sub>O<sub>3</sub>) except that the un-reduced Al<sub>2</sub>O<sub>3</sub> was adopted to replace the reduced Al<sub>2</sub>O<sub>3</sub>, hereinafter inclusive.

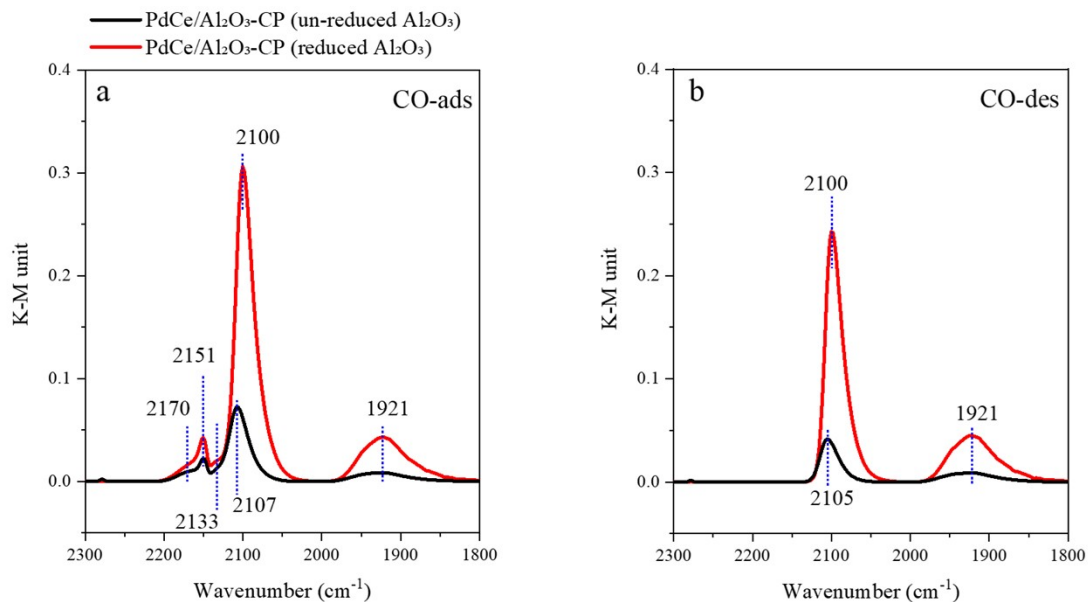

Fig. S3. The stabilized IR spectra of different catalysts during (a) CO adsorption in CO/He flow or (b) CO desorption in He flow.

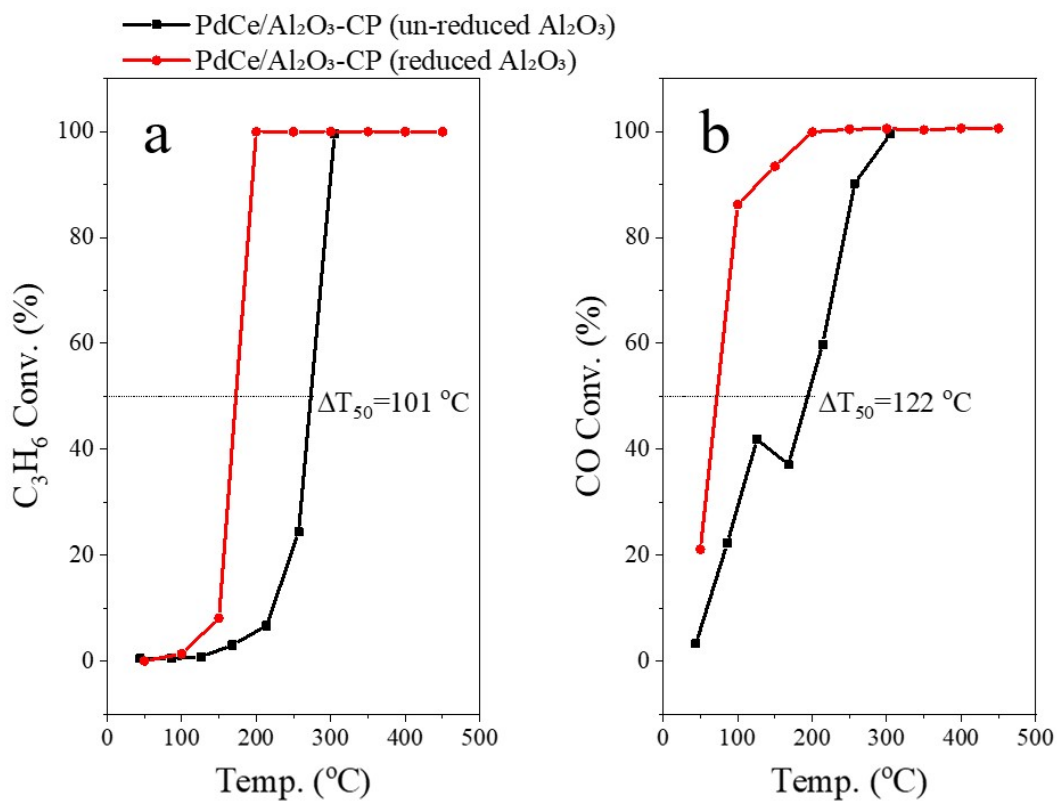

Fig. S4. Conversion-temperature curves of (a) C<sub>3</sub>H<sub>6</sub> and (b) CO over the different catalysts as indicated.

Table S1. The structural properties of different samples.

|                                          | $S_{\text{BET}}$ ( $\text{m}^2/\text{g}$ ) | Pore Volume ( $\text{cm}^3/\text{g}$ ) | Pore Size (nm) |
|------------------------------------------|--------------------------------------------|----------------------------------------|----------------|
| $\text{Al}_2\text{O}_3$ (reduced)        | 145                                        | 0.82                                   | 22.1           |
| $\text{PdCe}/\text{Al}_2\text{O}_3$ -CP  | 120                                        | 0.58                                   | 17.4           |
| $\text{PdCe}/\text{Al}_2\text{O}_3$ -Imp | 108                                        | 0.42                                   | 15.0           |

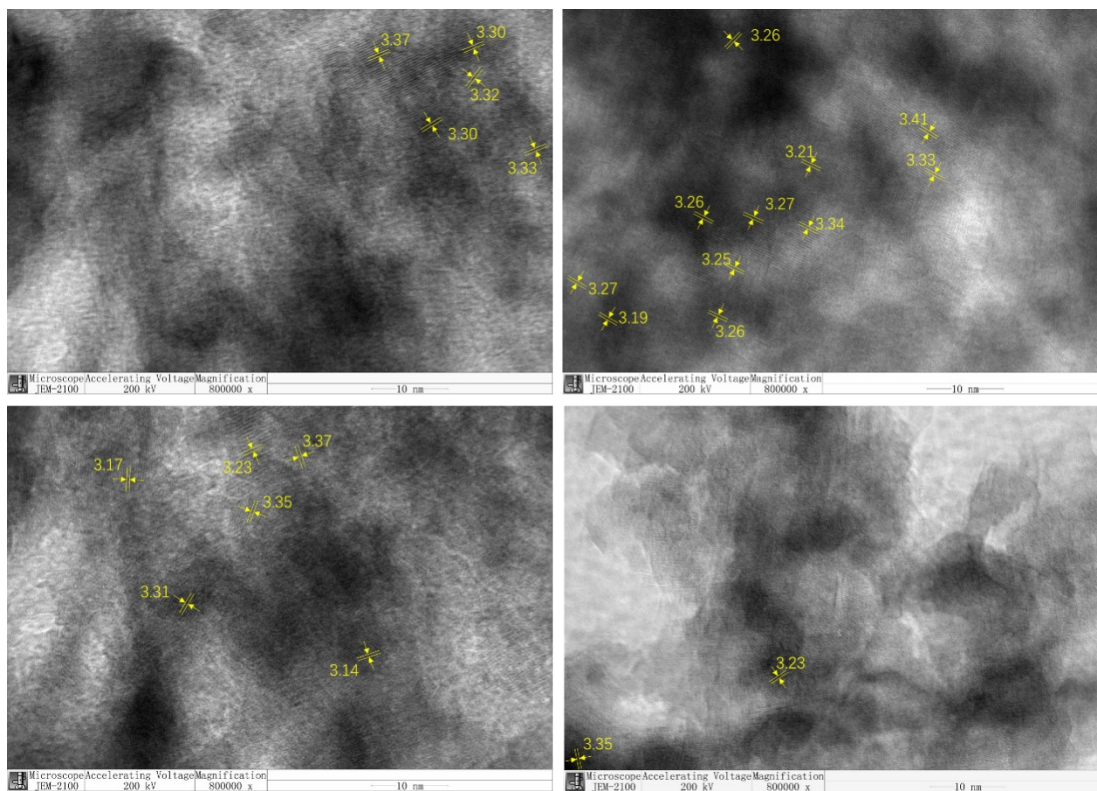

**Fig. S5.** HRTEM images of the  $\text{PdCe}/\text{Al}_2\text{O}_3$ -Imp. The lattice spacing of the  $\text{CeO}_2$  facets were noted in Å.

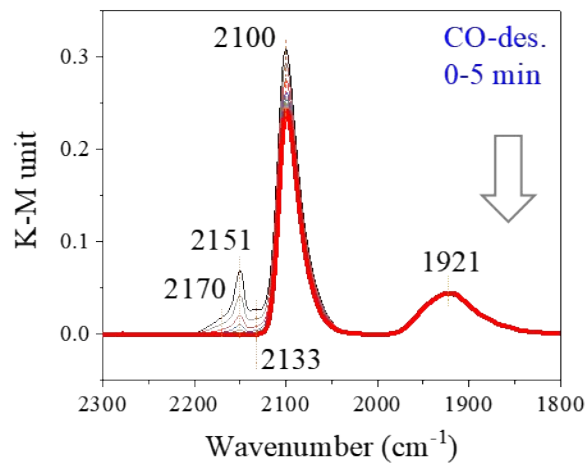

**Fig. S6.** The evolution of CO-DRIFTS curves over the PdCe/Al<sub>2</sub>O<sub>3</sub>-CP during CO desorption.

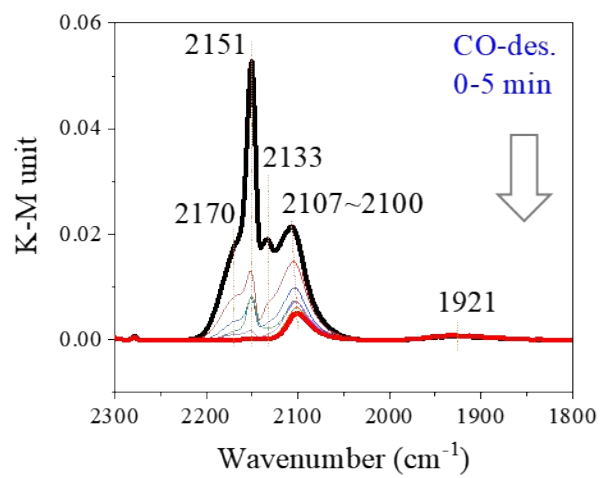

**Fig. S7.** The evolution of CO-DRIFTS curves over the PdCe/Al<sub>2</sub>O<sub>3</sub>-Imp during CO desorption.

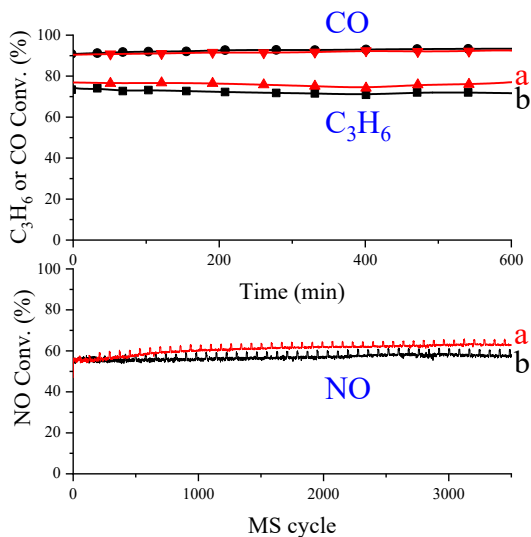

**Fig. S8.** The time-on-stream conversion of C<sub>3</sub>H<sub>6</sub>, CO, and NO over the different catalysts at 300 °C under an oxygen-deficient condition. a: PdCe/Al<sub>2</sub>O<sub>3</sub>-CP, b: PdCe/Al<sub>2</sub>O<sub>3</sub>-Imp. The concentrations of C<sub>3</sub>H<sub>6</sub> and CO were measured by GC, while that of NO by MS. Conditions: 0.1 g of catalysts, 0.1% CO/ 0.1% C<sub>3</sub>H<sub>6</sub>/ 0.05% NO/ 0.166% O<sub>2</sub>/ 8% CO<sub>2</sub>/ 8 H<sub>2</sub>O/ He, 150 mL/min.

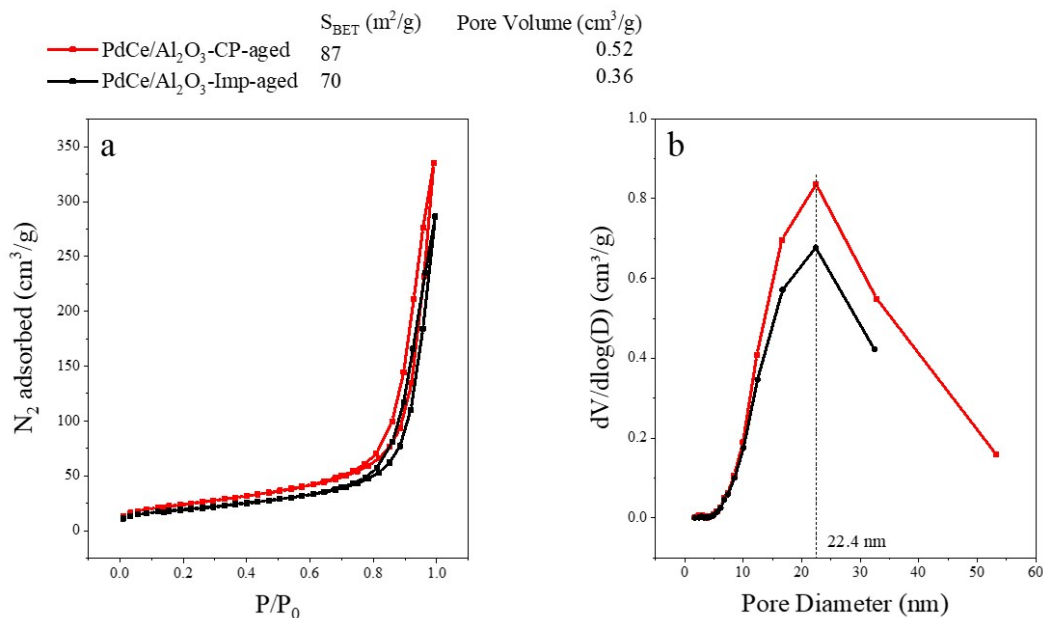

**Fig. S9.** The (a) isothermal N<sub>2</sub> adsorption/desorption curves and (b) the pore size distribution profiles of the different samples as indicated. the calcined PdCe/Al<sub>2</sub>O<sub>3</sub>-CP-c and PdCe/Al<sub>2</sub>O<sub>3</sub>-Imp-c samples were aged at 1000 °C in air for 4 h, then reduced by heating in 10% H<sub>2</sub>/He from RT to 500 °C, finally passivated in 1.5% O<sub>2</sub>/N<sub>2</sub> at RT for 12 h to get the aged samples PdCe/Al<sub>2</sub>O<sub>3</sub>-CP-aged and PdCe/Al<sub>2</sub>O<sub>3</sub>-Imp-aged, respectively, hereinafter inclusive.

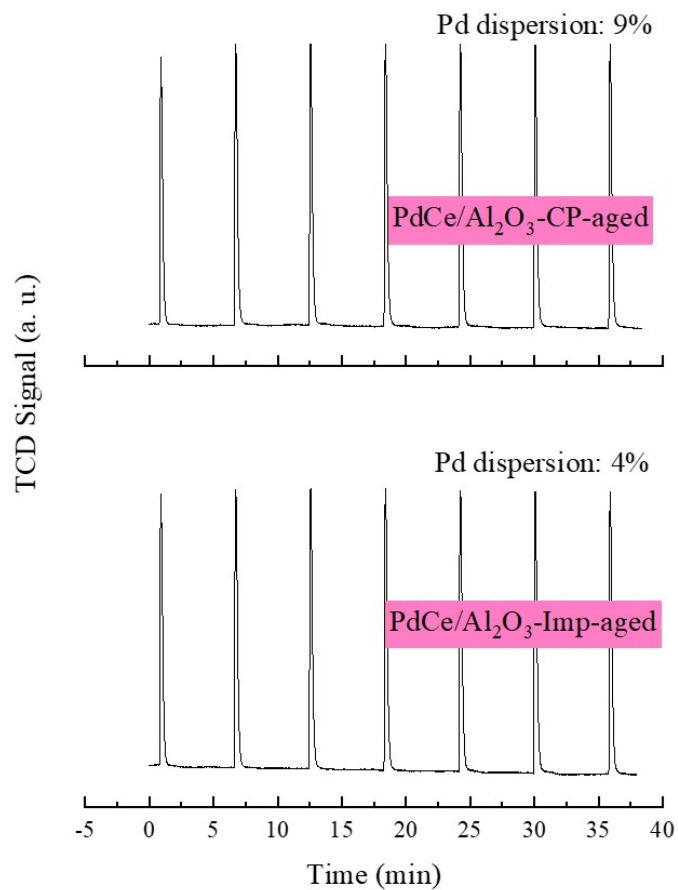

Fig. S10. The CO pulse-chemisorption curves of different catalysts as indicated.

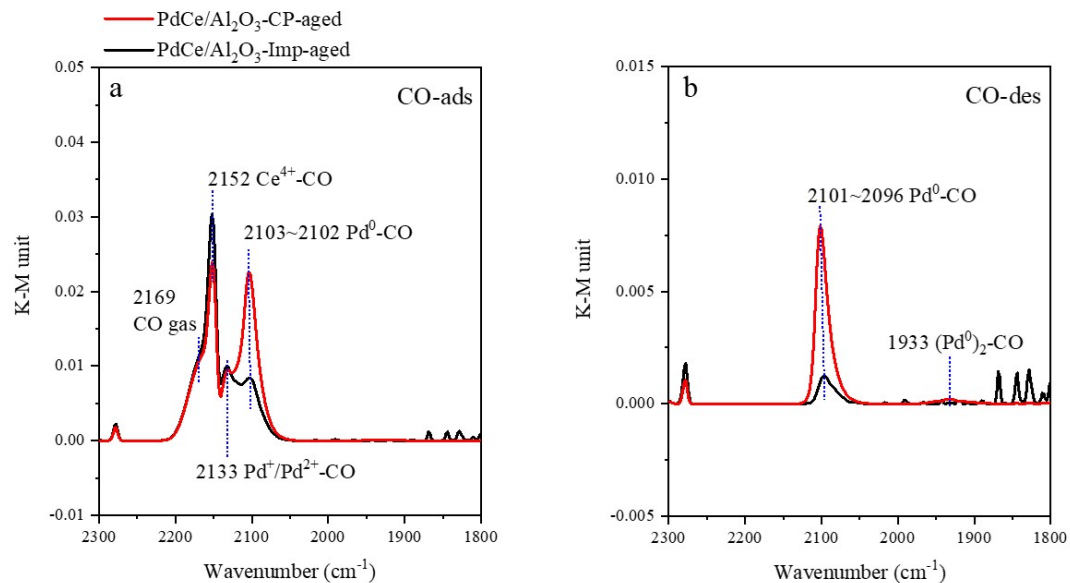

Fig. S11. The stabilized IR spectra of different catalysts during (a) CO adsorption in CO/He flow or (b) CO desorption in He flow.

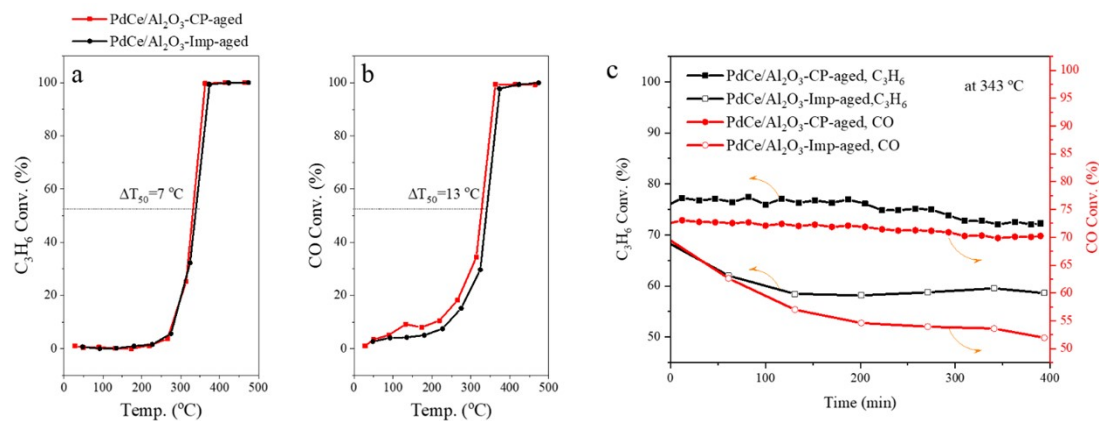

Fig. S12. Conversion-temperature curves of (a) C<sub>3</sub>H<sub>6</sub> and (b) CO over the different catalysts as indicated. (c) Time-on-stream curves of the C<sub>3</sub>H<sub>6</sub> and CO conversion over the different catalysts.

Table S2. The structural properties of different samples.

|                                               | S <sub>BET</sub> (m <sup>2</sup> /g) | Pore Volume (cm <sup>3</sup> /g) | Pore Size (nm) | Pd dispersion |
|-----------------------------------------------|--------------------------------------|----------------------------------|----------------|---------------|
| PdCe/Al <sub>2</sub> O <sub>3</sub> -CP       | 120                                  | 0.58                             | 17.4           | 37            |
| PdCe/Al <sub>2</sub> O <sub>3</sub> -Imp      | 108                                  | 0.42                             | 15.0           | 15            |
| PdCe/Al <sub>2</sub> O <sub>3</sub> -CP-aged  | 87                                   | 0.52                             | 22.4           | 9             |
| PdCe/Al <sub>2</sub> O <sub>3</sub> -Imp-aged | 70                                   | 0.36                             | 22.4           | 4             |
